# Supplementary material for: Physicochemical Characterization, and Relaxometry Studies of Micro-Graphite Oxide, Graphene Nanoplatelets, and Nanoribbons
Source: PLoS One. 2012 Jun 7;7(6):e38185. doi: 10.1371/journal.pone.0038185 (PMC3369907; doi:10.1371/journal.pone.0038185)
Supplement: Table S3 — List of parameter values in SBM equations that are fixed constants, or independently established physical quantities. (DOCX) [file pone.0038185.s014.docx]

**Table S3.** List of parameter values in SBM equations that are fixed constants, or independently established physical quantities.

| **Parameter** | **Definition** | **Value** |
| --- | --- | --- |
|  | Gyromagnetic constant for protons | 2.675x108 T-1S-1 |
|  | Electronic *g* factor | 2 |
|  | Bohr magneton | 9.274x10-24JT-1 |
|  | Free-space permeability constant | 10-7 NA-2 |
|  | Hyperfine coupling constant | 1 MHz |
|  | Reduced Planck’s constant | 1.054x10-34 |
|  | Proton Larmor Frequency |  |
|  | Electron Larmor Frequency |  |
|  | Spin number | 5/2 |
