# Supplementary material for: Physicochemical Characterization, and Relaxometry Studies of Micro-Graphite Oxide, Graphene Nanoplatelets, and Nanoribbons
Source: PLoS One. 2012 Jun 7;7(6):e38185. doi: 10.1371/journal.pone.0038185 (PMC3369907; doi:10.1371/journal.pone.0038185)
Supplement: Table S4 — SBM Parameters obtained from the curve fit with all parameter values floating. (DOCX) [file pone.0038185.s015.docx]

**Table S4**. SBM Parameters obtained from the curve fit with all parameter values floating.

| **Parameter** | **Definition** | **Oxidized Graphite** | **Graphene Nanoplatelets** | **Reduced Graphene Nanoplatelets** | **Graphene Nanoribbons** |
| --- | --- | --- | --- | --- | --- |
|  | Zero-field splitting energy (ZFS) |  |  |  |  |
|  | Manganese-Hydrogen Bond Radius |  |  |  |  |
|  | Hydration number |  |  |  |  |
|  | Tumbling time of complex |  |  |  |  |
|  | Correlation time for splitting |  |  |  |  |
|  | Residence time of inner sphere water molecules |  |  |  |  |
